# Supplementary material for: New Acorane-Type Sesquiterpene from Acorus calamus L
Source: PubMed Central journal article supplement (PMC6153993; doi:10.3390/molecules22040529), 2017-03-26

# Supporting Information

## New Acorane-Type Sesquiterpene from *Acorus calamus* L.

Juan Li <sup>1</sup>, Jianping Zhao <sup>2</sup>, Wei Wang <sup>1</sup>, Lin Li <sup>3</sup>, Lan Zhang <sup>3</sup>, Xiao-Fang Zhao <sup>1</sup>, Qing-Ru Liu <sup>1</sup>, Fang Liu <sup>1</sup>, Min Yang <sup>4</sup>, Ikhlas A.Khan <sup>2</sup>, Shun-Xiang Li <sup>1,\*</sup>

### Contents of Supporting Information

**Figure S1** <sup>1</sup>H NMR spectrum of neo-acorane A (**1**) (CDCl<sub>3</sub>, 500 MHz)

**Figure S2** <sup>13</sup>C NMR spectrum of neo-acorane A (**1**) (CDCl<sub>3</sub>, 125 MHz)

**Figure S3** <sup>1</sup>H-<sup>1</sup>H COSY spectrum of neo-acorane A(**1**) (CDCl<sub>3</sub>, 500 MHz)

**Figure S4** HSQC spectrum of neo-acorane A(**1**) (CDCl<sub>3</sub>, 500 MHz)

**Figure S5** HMBC spectrum of neo-acorane A(**1**) (CDCl<sub>3</sub>, 500 MHz)

**Figure S6** NOESY spectrum of neo-acorane A(**1**) (CDCl<sub>3</sub>, 500 MHz)

**Figure S7** IR spectrum of neo-acorane A (**1**)

**Figure S8** HRESIMS of neo-acorane A (**1**)

**Figure S9** UV spectrum of neo-acorane A (**1**)

Figure S1 <sup>1</sup>H NMR spectrum of neo-acorane A (1) (CDCl<sub>3</sub>, 500 MHz)

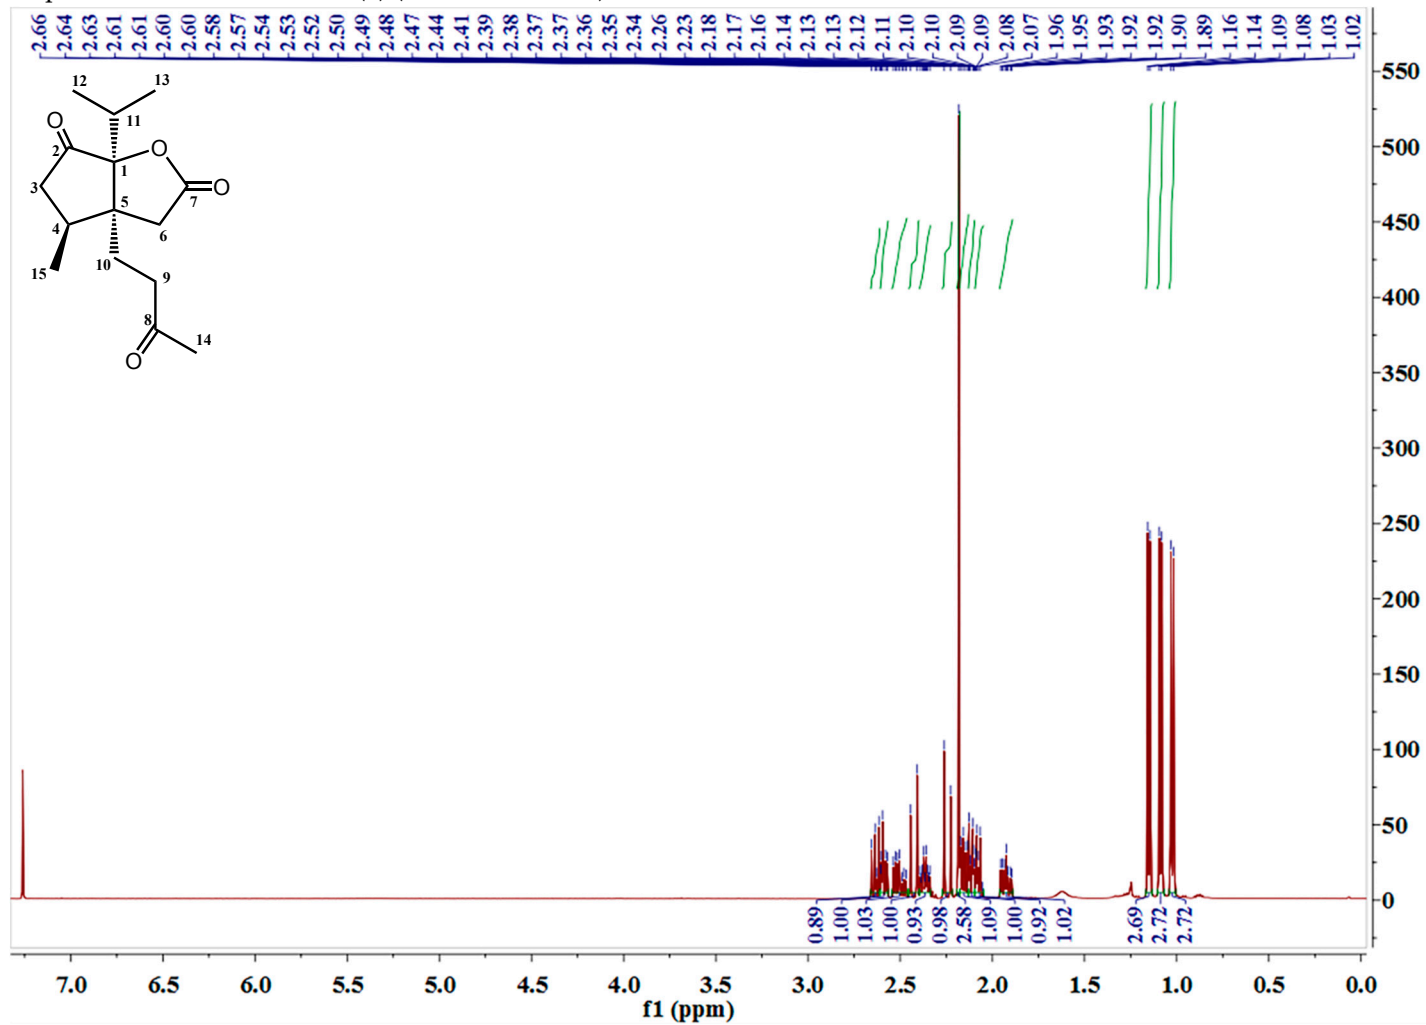

Figure S2  $^{13}\text{C}$  NMR spectrum of neo-acorane A (1) ( $\text{CDCl}_3$ , 125 MHz)

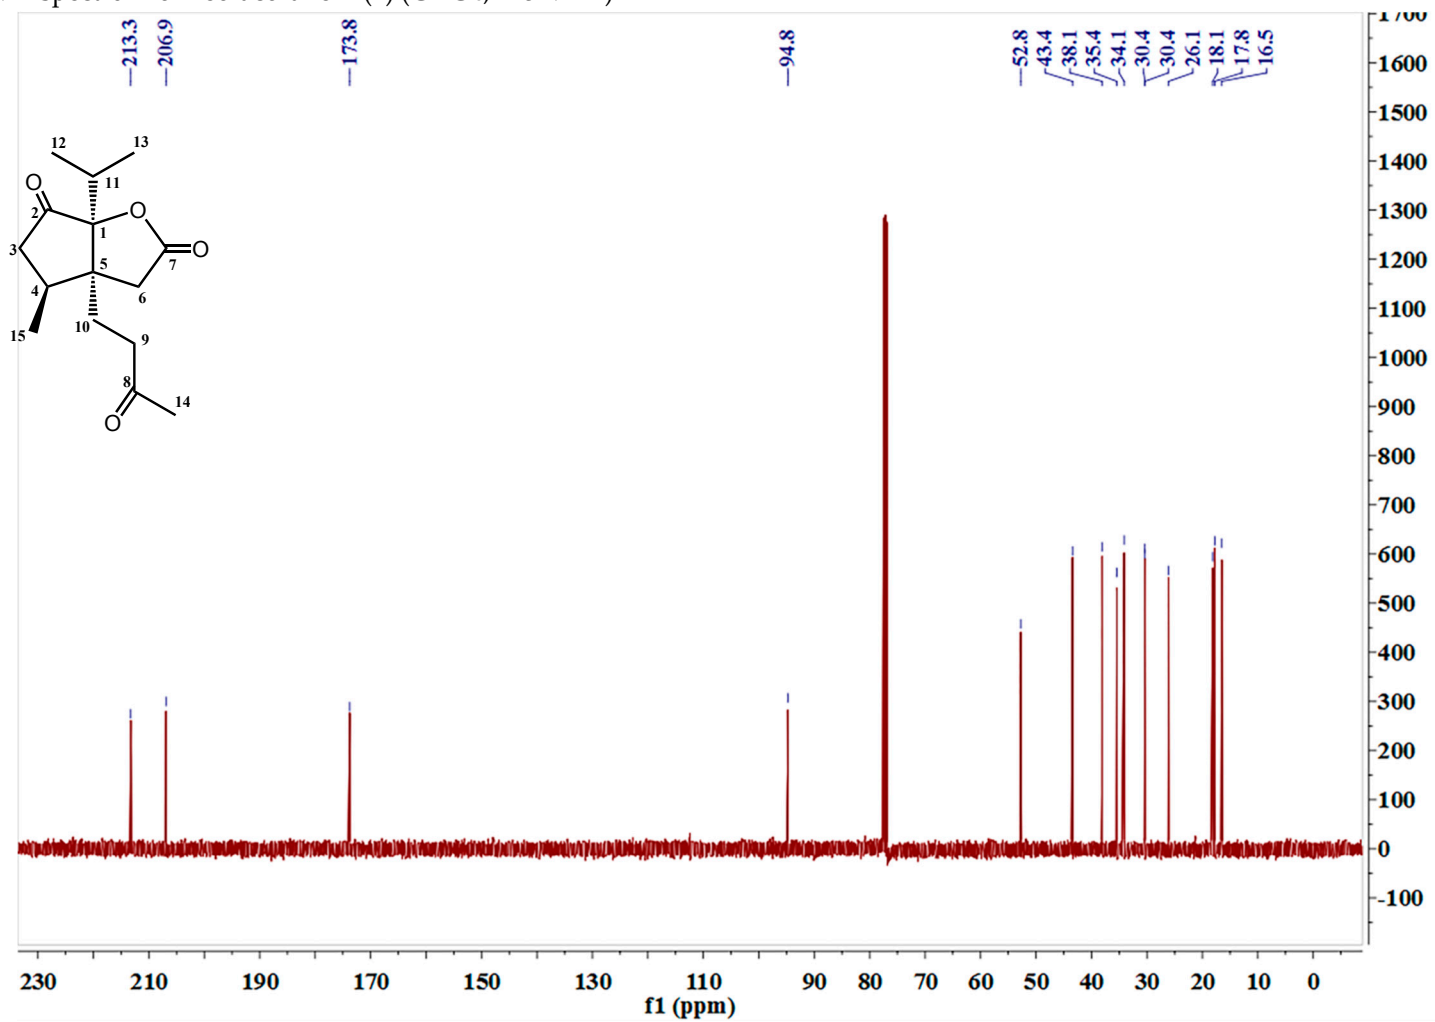

Figure S3  $^1\text{H}$ - $^1\text{H}$  COSY spectrum of neo-acorane A (**1**) ( $\text{CDCl}_3$ , 500 MHz)

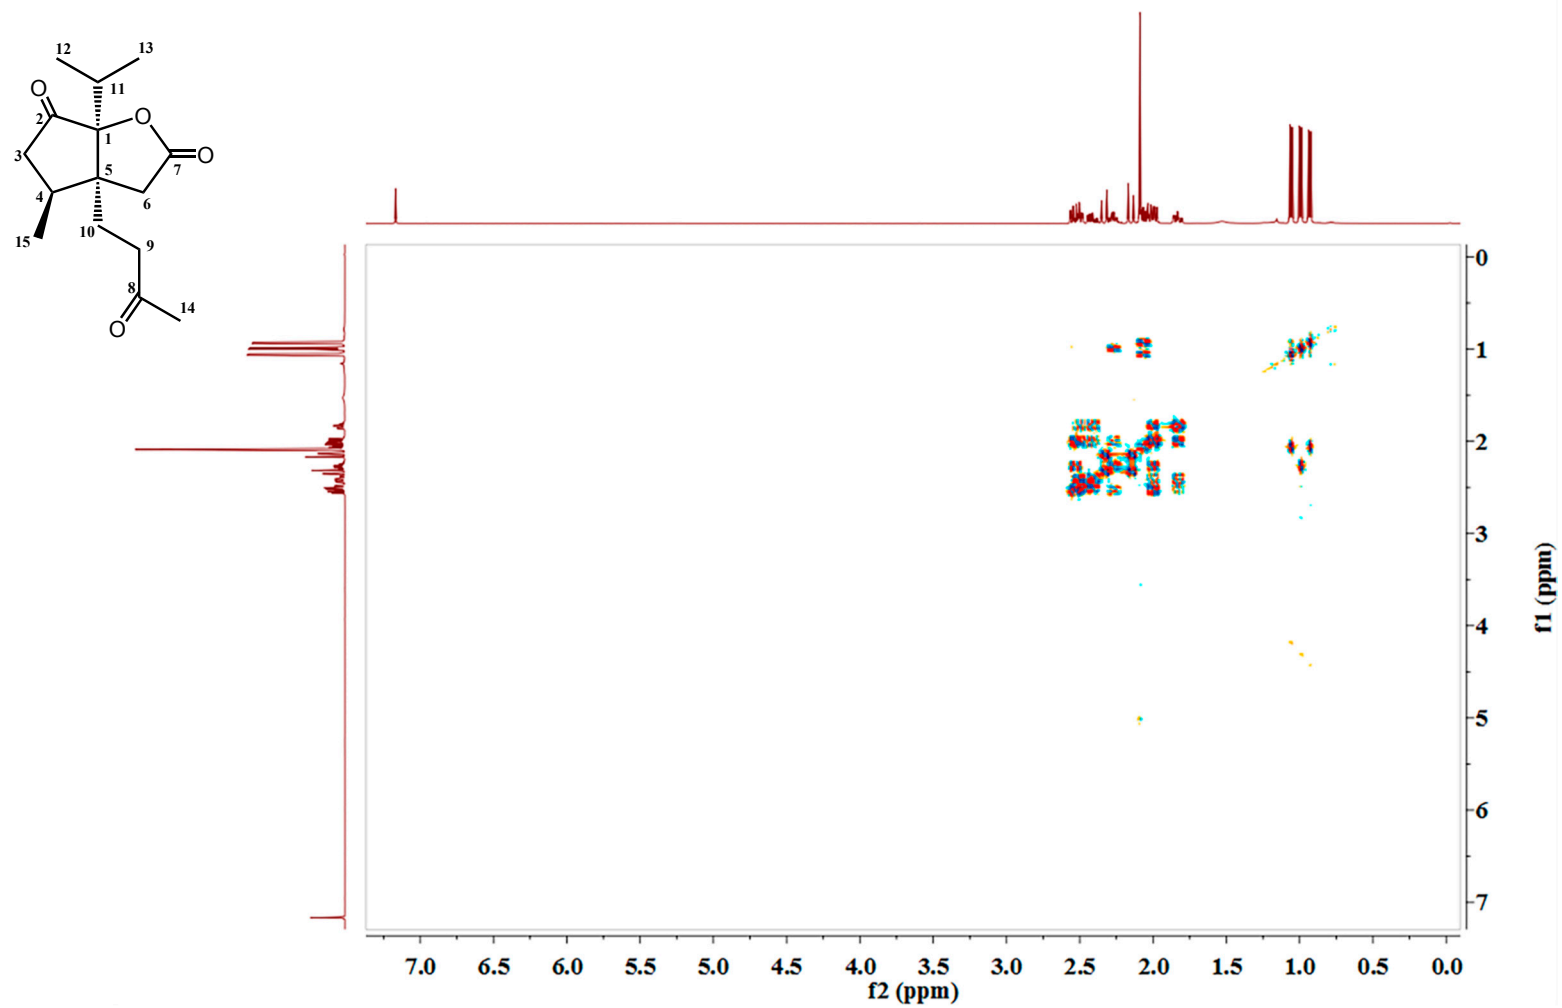

Figure S4 HSQC spectrum of neo-acorane A (1) (CDCl<sub>3</sub>, 500 MHz)

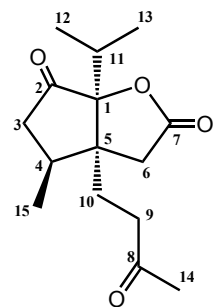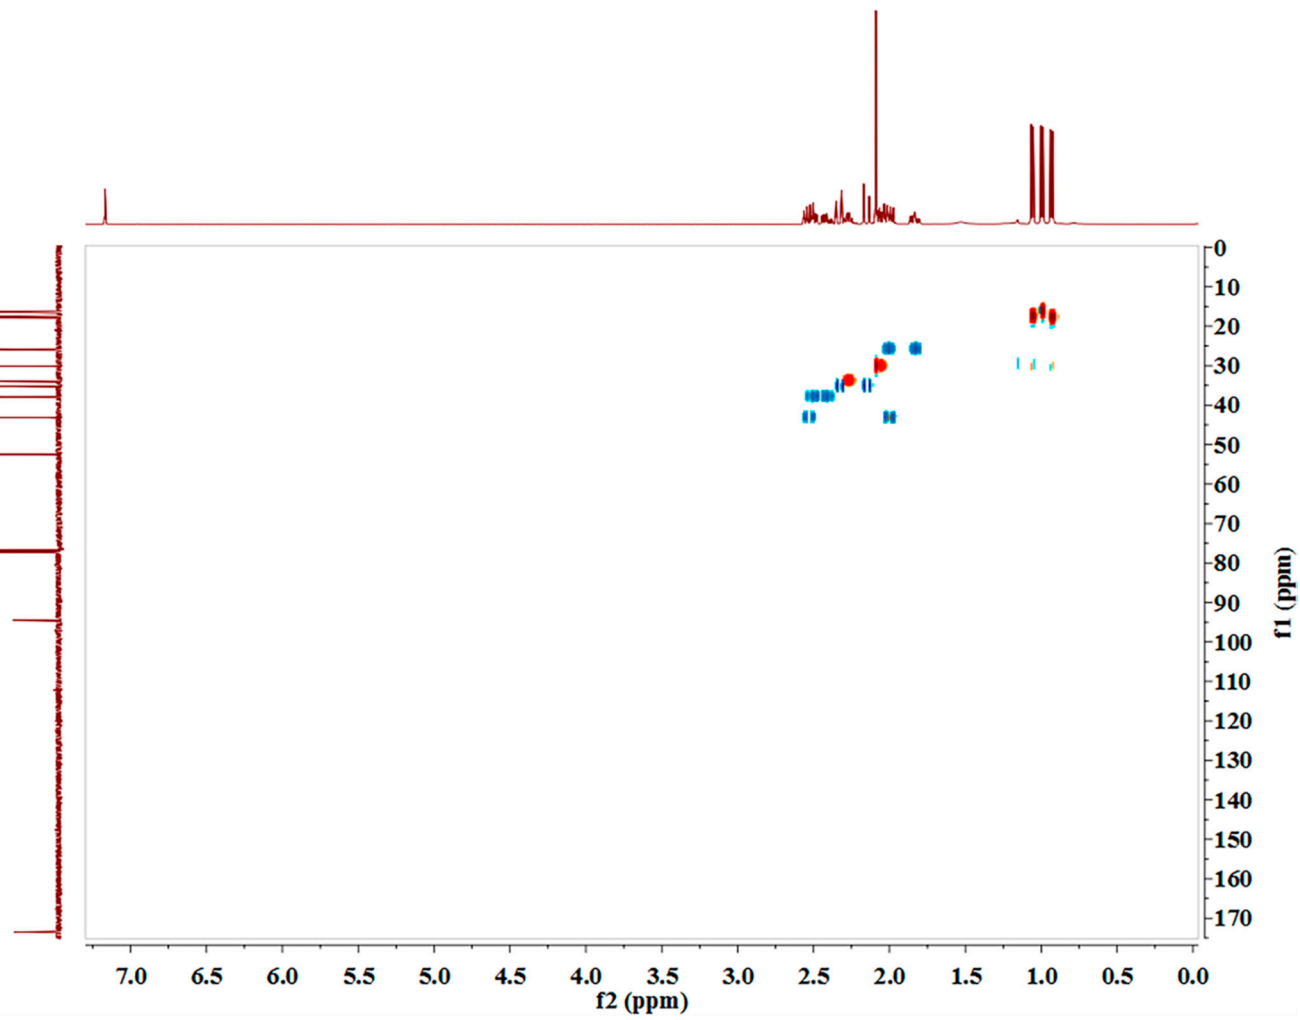

Figure S5 HMBC spectrum of neo-acorane A (1) (CDCl<sub>3</sub>, 500 MHz)

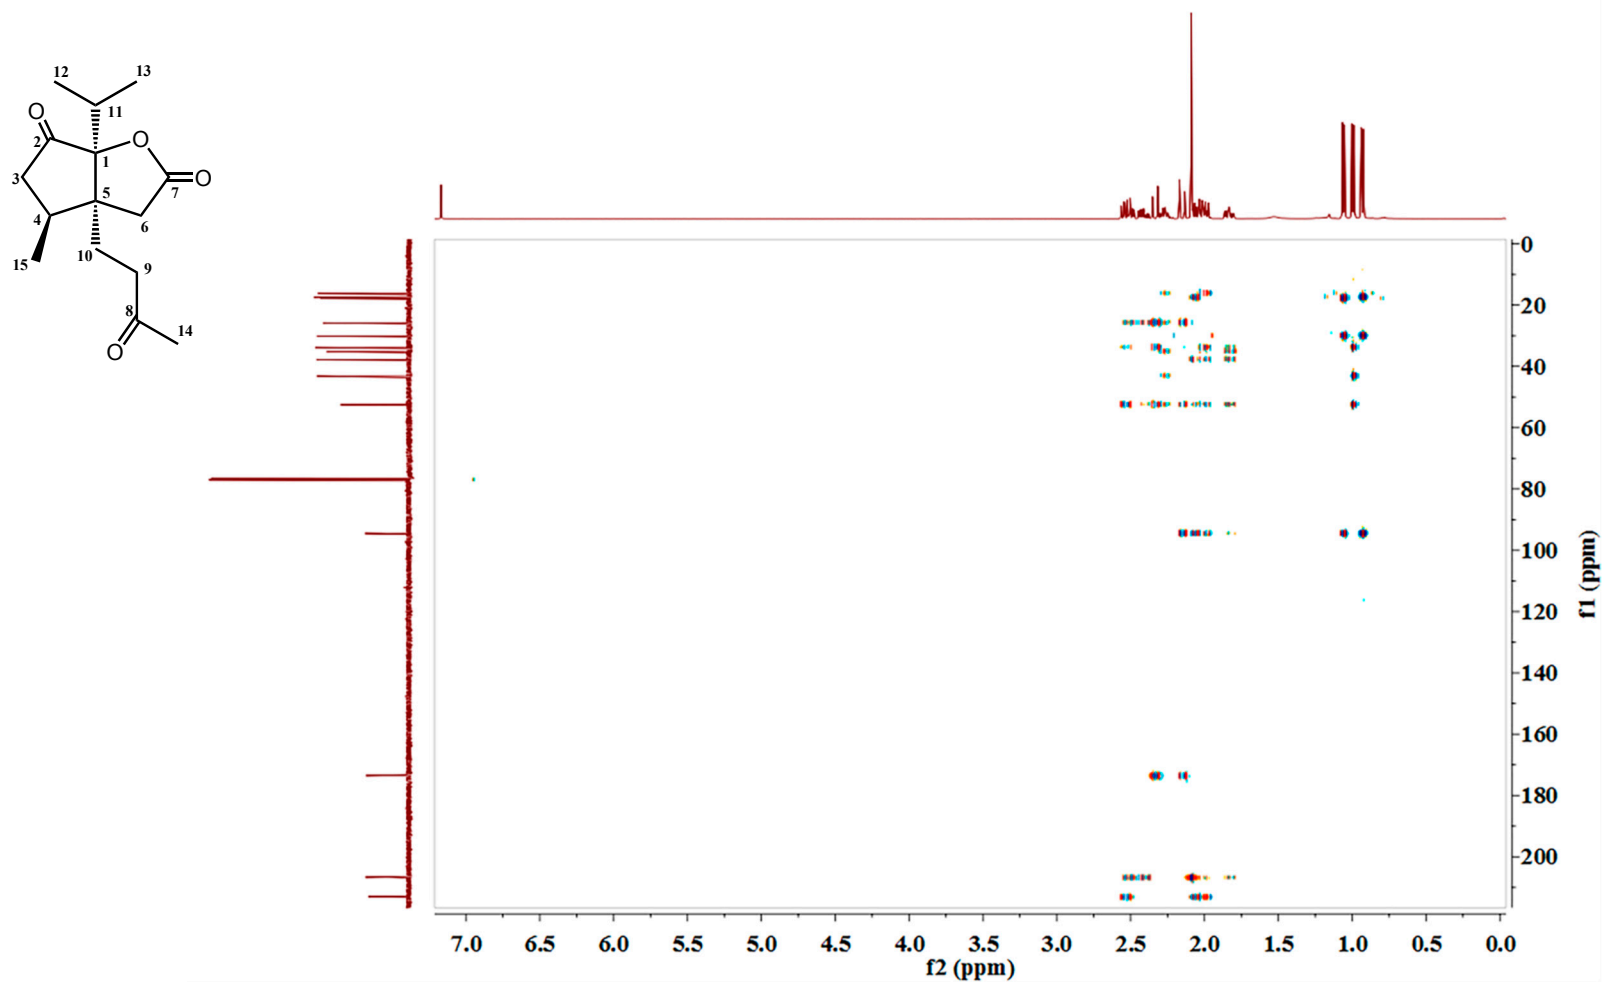

Figure S6 NOESY spectrum of neo-acorane A (1) (CDCl<sub>3</sub>, 500 MHz)

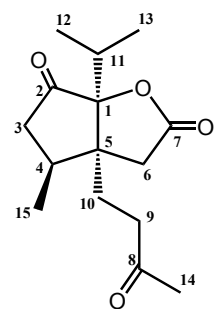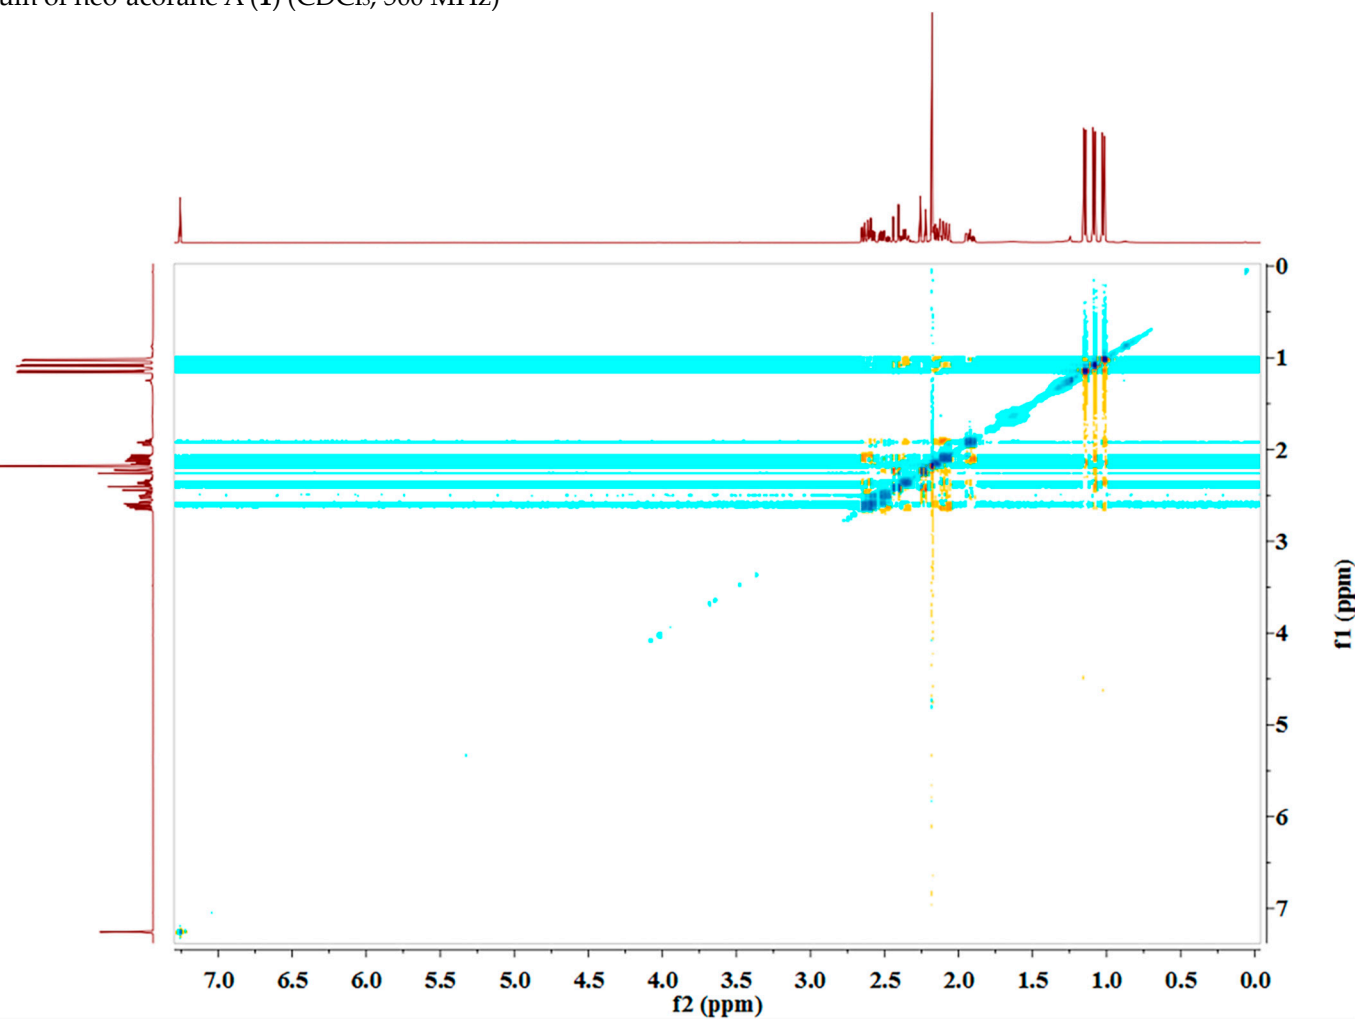

Figure S7 IR spectrum of neo-acorane A (1)

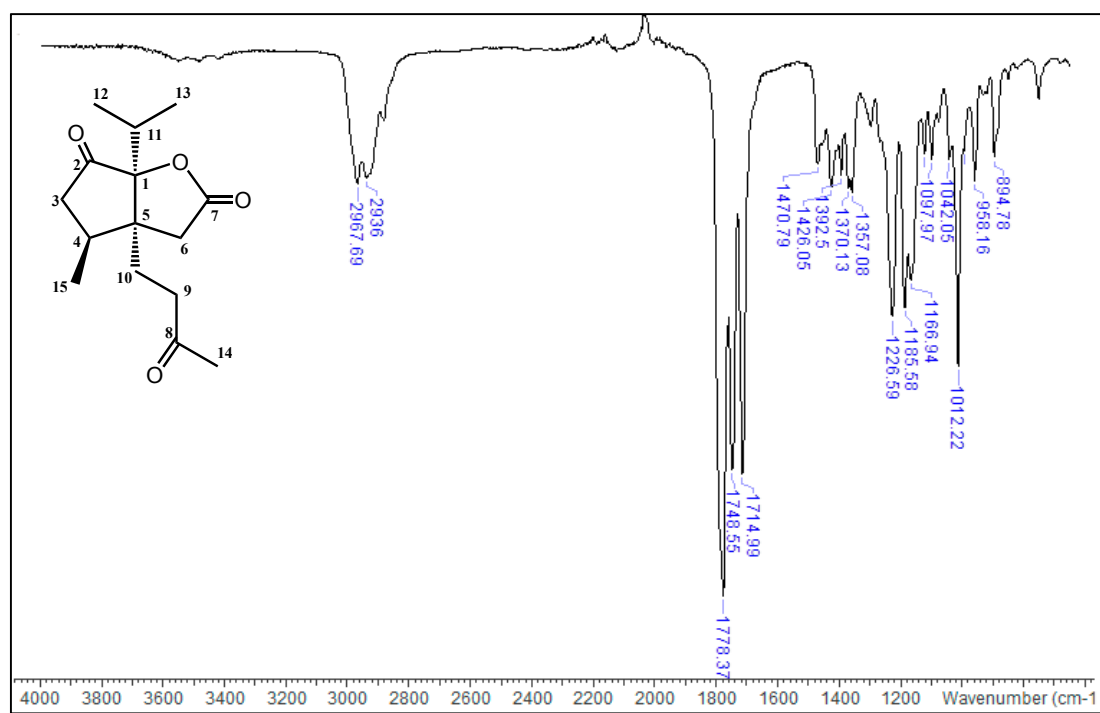



**Figure S8** HRESIMS of neo-acorane A (1)

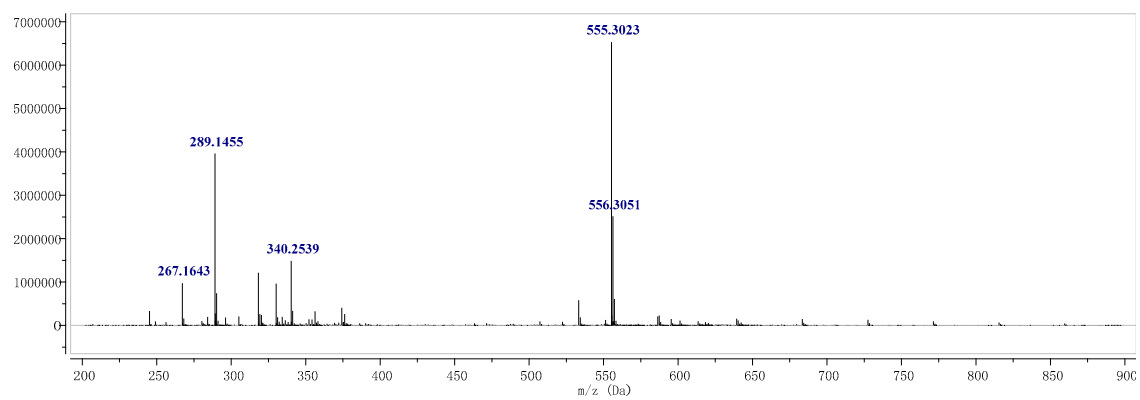

Figure S9 UV spectrum of neo-acorane A (1)

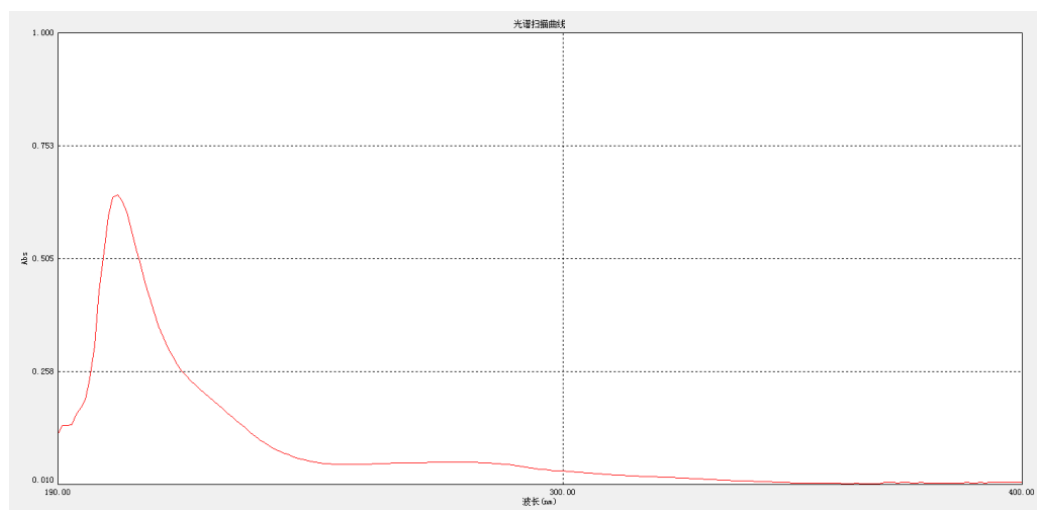

Supplement: molecules-22-00529-s001.pdf [file molecules-22-00529-s001.pdf]
